# Supplementary material
Source: publisher site journal article supplement (https://www.dovepress.com/article/367284)
Supplement: Supplementary file 1 [file get_supplementary_file.php]

**SUPPLEMENTAL TABLES**

**Table S1:** Odds ratios and 95% confidence intervals for reported knowledge on FEV<sub>1</sub> as shown in Figure 1 but stratified according to level of education (left) or previous educational training on COPD (right).

| Predictors                                       | Basic education            | Secondary/Higher education | Without prior educational training | With prior educational training |
|--------------------------------------------------|----------------------------|----------------------------|------------------------------------|---------------------------------|
| Male sex                                         | 2.52 [1.25, 5.10]          | <b>2.53 [1.34, 4.78]</b>   | 2.29 [1.17, 4.50]                  | 2.36 [1.16, 4.85]               |
| GOLD grade 3                                     | 7.36 [1.34, 40.48]         | 1.98 [0.75, 5.26]          | <b>5.39 [1.72, 16.97]</b>          | 2.07 [0.59, 7.25]               |
| GOLD grade 4                                     | <b>12.30 [1.81, 83.80]</b> | <b>2.91 [0.72, 11.85]</b>  | 4.37 [0.89, 21.48]                 | <b>6.39 [1.27, 32.20]</b>       |
| Exacerbations (GOLD group C or D)                | <b>2.98 [1.39, 6.41]</b>   | 1.51 [0.78, 2.94]          | <b>3.15 [1.51, 6.58]</b>           | 1.55 [0.76, 3.21]               |
| Osteoporosis                                     | 2.48 [1.11, 5.57]          | <b>2.81 [1.35, 5.88]</b>   | 2.43 [1.11, 5.33]                  | 2.47 [1.10, 5.59]               |
| Participation in COPD disease management program | <b>2.55 [1.13, 5.80]</b>   | <b>2.55 [1.27, 5.14]</b>   | 1.12 [0.45, 2.81]                  | <b>4.00 [1.99, 8.06]</b>        |
| Previous educational training on COPD            | 1.62 [0.80, 3.29]          | <b>2.83 [1.60, 5.02]</b>   |                                    |                                 |
| High satisfaction with knowledge                 | <b>2.90 [1.43, 5.92]</b>   | <b>3.19 [1.77, 5.79]</b>   | <b>3.52 [1.87, 6.66]</b>           | <b>3.05 [1.51, 6.15]</b>        |
| Secondary education                              |                            |                            | 2.56 [1.27, 5.19]                  | <b>4.71 [2.27, 9.99]</b>        |
| Higher education                                 |                            |                            | 1.67 [0.77, 3.66]                  | <b>6.60 [2.61, 16.69]</b>       |

Predictors were the same as those shown in Figure 2. Bold values indicated that statistical significance was achieved ( $p < 0.05$ ).

**Table S2:** Odds ratios and 95% confidence intervals for satisfaction with knowledge on COPD as shown in Figure 1 but stratified according to level of education (left) or previous educational training on COPD (right).

| Predictors                                 | Basic education          | Secondary/Higher education | Without prior educational training | With prior educational training |
|--------------------------------------------|--------------------------|----------------------------|------------------------------------|---------------------------------|
| Exacerbations (GOLD group C or D)          | 2.11 [1.01, 4.12]        | 1.44 [0.74, 2.87]          | 1.80 [0.93, 3.31]                  | 2.93 [0.77, 3.85]               |
| Sum of cardiac comorbidities (by 1)        | <b>0.52 [0.33, 0.88]</b> | <b>0.80 [0.56, 1.17]</b>   | <b>0.56 [0.35, 0.80]</b>           | 0.73 [0.49, 1.14]               |
| CAT (by 10)                                | 0.61 [0.40, 1.16]        | <b>0.43 [0.24, 0.71]</b>   | <b>0.47 [0.27, 0.68]</b>           | 0.53 [0.35, 1.03]               |
| EQ-5D-3L-VAS (by 10)                       | <b>1.36 [1.08, 1.64]</b> | <b>1.23 [1.01, 1.46]</b>   | 1.19 [0.99, 1.36]                  | <b>1.42 [1.08, 1.63]</b>        |
| Time since diagnosis of COPD (by 10 years) | 1.73 [1.25, 2.91]        | 1.60 [1.08, 2.34]          | 1.47 [1.04, 2.04]                  | <b>1.86 [1.12, 2.74]</b>        |
| COPD treatment plan                        | <b>3.27 [1.47, 6.62]</b> | <b>2.63 [1.26, 4.95]</b>   | <b>2.84 [1.52, 6.02]</b>           | <b>3.47 [1.32, 5.05]</b>        |
| Reported knowledge of FEV <sub>1</sub>     | <b>2.98 [1.43, 5.83]</b> | <b>3.10 [1.71, 5.66]</b>   | <b>3.33 [1.97, 6.35]</b>           | <b>2.74 [1.52, 5.72]</b>        |

Predictors were the same as those shown in Figure 2. Bold values indicated that statistical significance was achieved ( $p < 0.05$ ).
